# Supplementary material
Source: publisher site journal article supplement (https://www.dovepress.com/article/256316)
Supplement: Supplementary file 1 [file get_supplementary_file.php]

| **Supporting TABLE S1. primers, sgRNA sequences, and siRNA sequences** | | |
| --- | --- | --- |
| RT-qPCR Primers | | |
| ONECUT2-qF | | GGAATCCAAAACCGTGGAGTAA |
| ONECUT2-qR | | CTCTTTGCGTTTGCACGCTG |
| YWHAB-qF | | GCAGCCTACACACCCAATTC |
| YWHAB -qR | | TTCAGCGTATCCAATTCAGCAA |
| PSEN1-qF | | ACAGGTGCTATAAGGTCATCCA |
| PSEN1-qR | | CAGATCAGGAGTGCAACAGTAAT |
| TCF7L2-qF | | TGGAGGGCTCTTTAAGGGG |
| TCF7L2-qR | | GATCCGTTGGGGAGGTAGG |
| PLCB3-qF | | GCCTCAAATTCAACCGGAGTG |
| PLCB3-qR | | TGTTCAGGAACCGCTCAAAGA |
| TBL1XR1-qF | | GGGGCCATGAATCTGAAGTTT |
| TBL1XR1-qR | | TAACTGTGTAGAGCCACTGGT |
| SAMD3-qF | | TTACAGTGGACGAAGTCCTATGT |
| SAMD3-qR | | TGAGCCTTCCAGATACTTAGTCA |
| FZD5-qF | | CCGTTCGTGTGCAAGTGTC |
| FZD5-qR | | GAAGCGTTCCATGTCGATGAG |
| LRP5-qF | | ACTCGCTGTGAGGAGGACAAT |
| LRP5-qR | | GGCAGGCGCATGTGTAGAA |
| CHP2-qF | | GTTCTCCGTCTGATGGTTGGG |
| CHP2-qR | | ACTTGGTGAACTCCACGAAGG |
| PPP2R5A-qF | | TGCTAACATCTTCCGTACACTTC |
| PPP2R5A -qR | | CCTCAAGCGTGGGTTCATCC |
| ATR-qF | | AGCAGCGATACTGTTGAATGTG |
| ATR -qR | | TGCCTCGATGAGGAAAACCAC |
| GSK3B-qF | | TGGTCGCCATCAAGAAAGTATTG |
| GSK3B-qR | | GCGTCTGTTTGGCTCGACTAT |
| PPP3CA-qF | | GCGCATCTTATGAAGGAGGGA |
| PPP3CA-qR | | TGACTGGCGCATCAATATCCA |
| CXXC4-qF | | ATGCACCACCGAAACGACTC |
| CXXC4-qR | | GCAGTGTTCAGGGGATAAGGT |
| CDK6-qF | | TCTTCATTCACACCGAGTAGTGC |
| CDK6-qR | | TGAGGTTAGAGCCATCTGGAAA |
| SIAH1-qF | | ATGACTTGGCGAGTCTTTTTGA |
| SIAH1-qR | | CTTTGGGCGACAGTTGCTAC |
| ROCK1-qF | | GGTGGTCGGTTGGGGTATTTT |
| ROCK1-qR | | CGCCCTAACCTCACTTCCC |
| RB1-qF | | TGCTAAAGCTGTGGGACAGG |
| RB1-qR | | GCGCACGCCAATAAAGACAT |
| PRKCA-qF | | TGGACTTATCCATCAAGGGATGA |
| PRKCA-qR | | AGTGTGATCCATTCCGCAGAG |
| NLK-qF | | GTTAAGGCGCACCATCATCAG |
| NLK-qR | | GGGCAGAGAGTACATTATCATGC |
| ACTB-qF | | TTGTTACAGGAAGTCCCTTGCC |
| ACTB-qR | | ATGCTATCACCTCCCCTGTGTG |
|  |  | |
| ONECUT2 siRNA sequences | | |  |
| siONECUT2-1 | | CCGGAGCTGACAATGGAAA |
| siONECUT2-2 | | GCCAGCTGGAAGAAATCAA |
|  | |  |
| ChIP primers | | |
| ROCK1-ChIP-qF | | GCGGTCTCCGTTTGTTTGAA |
| ROCK1-ChIP-qR | | GGGCGAAGAGGAAGACGATA |
|  | |  |
| ONECUT2 sgRNAs | | |
| ONECUT2-sgRNA1 | | CGAAGAGTGTTCGGCGTTGG |
| ONECUT2-sgRNA2 | | ACCCTCATGCGCGACGAGCG |

| **Supporting TABLE S2. Antibodies used in this study** | | | |
| --- | --- | --- | --- |
| Name | Company | Catalog Number | Use |
| ONECUT2 | Proteintech | 21916-1-AP | WB |
| ACTB | Proteintech | 23660-1-AP | WB |
| IgG | Proteintech | 10284-1-AP | ChIP |
| Flag tag | CST signaling | 14793S | ChIP |
